# Supplementary material for: Macrophage migration inhibitory factor regulates TLR4 expression and modulates TCR/CD3-mediated activation in CD4+ T lymphocytes
Source: PubMed Central journal article supplement (PMC6599059; doi:10.1038/s41598-019-45260-6), 2019-06-28
Supplement: 41598_2019_45260_MOESM1_ESM.pdf [file 41598_2019_45260_MOESM1_ESM.pdf]

## Macrophage migration inhibitory factor regulates TLR4 expression and modulates TCR/CD3-mediated activation in CD4<sup>+</sup> T lymphocytes

Mohamed Alibashe-Ahmed, Thierry Roger, Veronique Serre-Beinier, Ekaterine Berishvili, Walter Reith, Domenico Bosco, and Thierry Berney

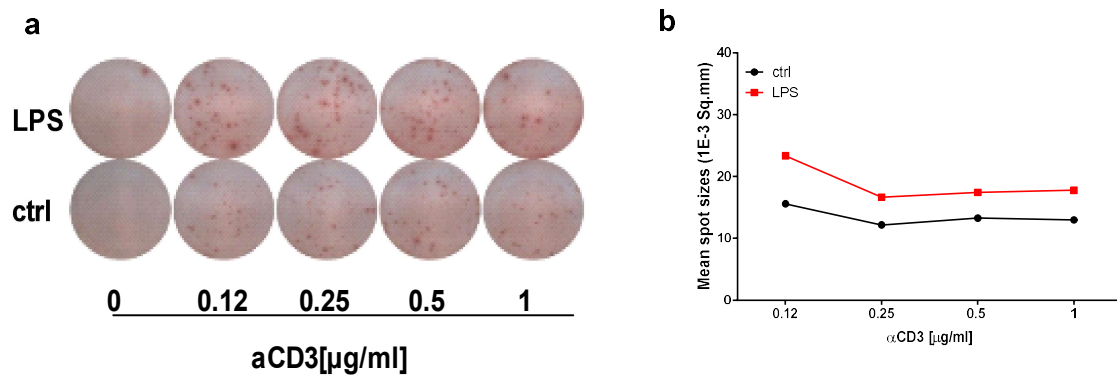

**Figure S1: LPS increases the number of IFN $\gamma$ -producing T lymphocytes** a) Representative images of IFN $\gamma$ -ELISPOT of CD3<sup>+</sup> T lymphocytes stimulated with LPS b) Qualitative measurement of IFN $\gamma$  production represented by IFN $\gamma$ -ELISPOT mean spot size in presence (red) or absence (black) of LPS Data are means of five experiments (b)

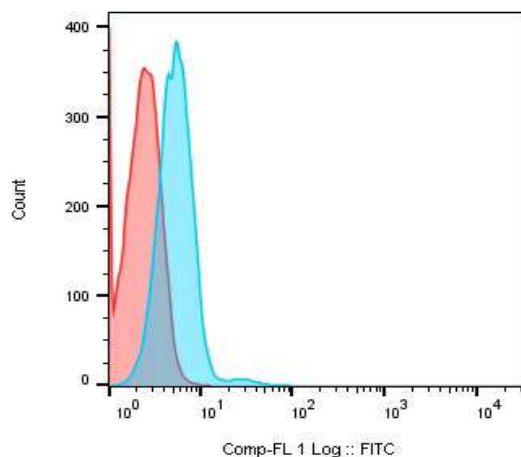

**Figure S2: LPS directly interacts with CD4<sup>+</sup> T lymphocytes.** Representative image of purified CD4<sup>+</sup> T lymphocytes stained with FITC-labelled-LPS (blue) and without (red).

| REAGENT or RESOURCE                                                          | SOURCE            | IDENTIFIER  |
|------------------------------------------------------------------------------|-------------------|-------------|
| <b>Antibodies</b>                                                            |                   |             |
| low endotoxin azide free (LEAF) purified anti-mouse CD3ε antibody (145-2C11) | Biolegend         | 100314      |
| low endotoxin azide free (LEAF) purified anti-mouse CD3ε antibody (17A2)     | Biolegend         | 100208      |
| Pure anti-CD28 (clone 37.51)                                                 | Miltenyi Biotec   | 130-093-182 |
| Mouse Pan T Cell Isolation Kit II                                            | Miltenyi Biotec   | 130-095-130 |
| Mouse CD4 <sup>+</sup> T Cell Isolation Kit                                  | Miltenyi Biotec   | 130-104-454 |
| FITC anti-mouse CD25 Antibody (3C7)                                          | Biolegend         | 101908      |
| PE/Cy7 anti-mouse CD69 Antibody (H1.2F3)                                     | Biolegend         | 104512      |
| PE anti-mouse CD69 Antibody (H1.2F3)                                         | Biolegend         | 104508      |
| PE/Cy7 anti-mouse CD8a Antibody (53-6.7)                                     | Biolegend         | 100708      |
| PE anti-mouse CD8a Antibody (53-6.7)                                         | Biolegend         | 100722      |
| APC/Cy7 anti-mouse CD8a Antibody (53-6.7)                                    | Biolegend         | 100714      |
| APC anti-mouse CD8a Antibody (53-6.7)                                        | Biolegend         | 100711      |
| PerCP anti-mouse CD4 Antibody (RM4-5)                                        | Biolegend         | 100537      |
| PE/Dazzle™ 594 anti-mouse CD4 Antibody (GK1.5)                               | Biolegend         | 10455       |
| PE anti-mouse CD3 Antibody (17A2)                                            | Biolegend         | 100205      |
| FITC anti-mouse IFN-γ Antibody (XMG1.2)                                      | Biolegend         | 505806      |
| PE anti-mouse IL-2 (JES6-5H4)                                                | Biolegend         | 503807      |
| FITC Rat IgG1 κ Isotype Ctrl Antibody (RTK2071)                              | Biolegend         | 400405      |
| PE Rat IgG2b κ Isotype Ctrl Antibody (RTK4530)                               | Biolegend         | 400607      |
| FITC Rat IgG2b κ Isotype Ctrl Antibody (RTK4530)                             | Biolegend         | 400634      |
| PE Rat IgG2a κ Isotype Ctrl Antibody (RTK2758)                               | Biolegend         | 400508      |
| PE Armenian Hamster IgG Isotype Ctrl Antibody (HTK888)                       | Biolegend         | 400907      |
| PE/Cy7 Rat IgG1 κ Isotype Ctrl Antibody (RTK2071)                            | Biolegend         | 400416      |
| Zombie Red™ Fixable Viability Kit (                                          | Biolegend         | 423110      |
| <b>Bacterial and Virus Strains</b>                                           |                   |             |
| ultrapure LPS from <i>E. coli</i> O111:B4                                    | Invivogen         | Tlrl-3pelps |
| ultrapure LPS from <i>P. gingivalis</i>                                      | Invivogen         | Tlrl-ppglps |
| ultrapure LPS from <i>S. minnesota</i> R595                                  | Invivogen         | Tlrl-smlps  |
| FITC-conjugated Lipopolysaccharides from <i>Escherichia coli</i> O111:B4     | Sigma-Aldrich     | F3665-1MG   |
| <b>Chemicals, Peptides, and Recombinant Proteins</b>                         |                   |             |
| CLI-095                                                                      | Invivogen         | Tlrl-cli95  |
| CFSE                                                                         | Life Technologies | C34554      |
| recombinant mouse MIF                                                        | Biolegend         |             |
| ISO-1                                                                        | Merck Millipore   | 475837      |
| <b>Critical Commercial Assays</b>                                            |                   |             |
| Cell Activation Cocktail                                                     | Biolegend         | 423303      |
| Intracellular Fixation & Permeabilization Buffer Set                         | eBioscience       | 88-8824-00  |

|                                                                              |                                                 |            |
|------------------------------------------------------------------------------|-------------------------------------------------|------------|
| Mouse IL-2 Ready-SET-Go! kits                                                | Thermofischer                                   | 88-7024-22 |
| Mouse IFN $\gamma$ Ready-SET-Go! kits                                        | Thermofischer                                   | 88-7314-22 |
| Mouse TNF $\alpha$ Ready-SET-Go! kits                                        | Thermofischer                                   | 88-7324-22 |
| Mouse IFN $\gamma$ from ELISPOT Ready-SET-Go                                 | Thermofischer                                   | 88-7384-21 |
| Mouse MIF ELISA kit                                                          | Biomatik                                        | EKU05762   |
| High Capacity cDNA Reverse transcription kit                                 | ThermoFischer Scientific                        | 4368814    |
| PeqGold Trifast                                                              | PeqLab                                          | 30-2010    |
| TaqMan Fast Advance Master Mix                                               | ThermoFischer Scientific                        | 4444556    |
| <b>Experimental Models: Organisms/Strains</b>                                |                                                 |            |
| Mouse NOD/BDC2.5<br>NOD.CgTg(TcraBDC2.5,TcrbBDC2.5)1Doi/DoiJ<br>(NOD/BDC2.5) | Jackson Laboratory                              | 004460     |
| Mouse TLR4 <sup>-/-</sup> B6.B10ScN-Tlr4lps-del/JthJ                         | Jackson Laboratory                              | 007227     |
| Mouse TLR4 <sup>+/+</sup> C57BL/6J                                           | Jackson Laboratory                              | 000664     |
| Mouse MIF <sup>-/-</sup>                                                     | John David (Harvard Medical School, Boston, MA) |            |
| Mouse MIF <sup>+/+</sup>                                                     | John David (Harvard Medical School, Boston, MA) |            |
| <b>Oligonucleotides</b>                                                      |                                                 |            |
| Primer mouse Rplp0 (Mm99999223_gH)                                           | ThermoFischer Scientific                        | 4331182    |
| Primer mouse Tlr4 (Mm00445273_m1)                                            | ThermoFischer Scientific                        | 4331182    |
| <b>Software and Algorithms</b>                                               |                                                 |            |
| GraphPad Prism 7                                                             | GraphPad Software                               |            |
| FlowJo V_10                                                                  | FlowJo, LLC                                     |            |

**Supplementary Table S1: list of materials.**
